# Supplementary material for: Association of Sentinel Node Biopsy and Pathological Report Completeness with Survival Benefit for Cutaneous Melanoma and Factors Influencing Their Different Uses in European Populations
Source: MDPI journal article supplement (doi:10.3390/cancers14184379), 2022-09-08
Supplement: s1 [file s1]

**Supplementary Table S1** - Total number of cutaneous melanoma cases submitted for inclusion in the HR study by country and registry, with criteria for selection of cases.

| Country     | Cancer Registry   | Number of cases | Criteria for selection                                                                                                                                                                                       |
|-------------|-------------------|-----------------|--------------------------------------------------------------------------------------------------------------------------------------------------------------------------------------------------------------|
| Bulgaria    | Bulgaria National | 319             | All incident cases in the Sofia-city administrative district for the period 2011-2013                                                                                                                        |
| Estonia     | Estonia National  | 381             | All incident cases in 2010-2011                                                                                                                                                                              |
| Italy       | Modena            | 231             | All incident cases in 2011-2012                                                                                                                                                                              |
| Italy       | Ragusa            | 136             | All incident cases in 2009-2012                                                                                                                                                                              |
| Italy       | Veneto            | 549             | All incident cases in 2013                                                                                                                                                                                   |
| Portugal    | Northern Portugal | 300             | All patients consecutively admitted in the unique specialized oncology center existent in the cancer in the registry coverage area, until the minimum number of cases requested by the HR study was achieved |
| Portugal    | Southern Portugal | 470             | All incident cases in 2012                                                                                                                                                                                   |
| Spain       | Girona            | 287             | All incident cases in the province of Girona in 2009-2012                                                                                                                                                    |
| Spain       | Granada           | 341             | All incident cases in 2011                                                                                                                                                                                   |
| Spain       | Navarra           | 306             | All incident cases in the region in the year 2013, plus in January and February 2014 in order to reach the requested number of cases                                                                         |
| Switzerland | Geneva            | 473             | All incident cases in 2011-2013                                                                                                                                                                              |

**Supplementary Table S2.** Number of cases and adjusted 5-year Relative Excess rate of Risk of death (RER) with 95% Confidence Interval (CI) for cutaneous melanoma patients diagnosed in 2009-2013 in four European countries.

|                                             | <i>N</i> | <i>RER</i>  | <i>95% CI</i> | <i>p-value</i> |
|---------------------------------------------|----------|-------------|---------------|----------------|
| <b>Country<sup>2</sup></b>                  |          |             |               |                |
| Estonia                                     | 345      | <b>1.01</b> | [0.72-1.41]   | 0.960          |
| Italy                                       | 355      | <b>1.21</b> | [0.83-1.76]   | 0.314          |
| Portugal                                    | 300      | <b>0.96</b> | [0.70-1.31]   | 0.787          |
| Spain                                       | 922      | <b>0.85</b> | [0.66-1.10]   | 0.229          |
| <b>Age at diagnosis (years)</b>             |          |             |               |                |
| 15-54                                       | 759      | <b>0.82</b> | [0.52-1.28]   | 0.383          |
| 55-64                                       | 345      | <b>0.98</b> | [0.60-1.60]   | 0.942          |
| 65-74                                       | 376      | <b>1.02</b> | [0.66-1.58]   | 0.942          |
| 75+                                         | 442      | <b>1</b>    |               |                |
| <b>Sex</b>                                  |          |             |               |                |
| Men                                         | 886      | <b>1</b>    |               |                |
| Women                                       | 1036     | <b>0.86</b> | [0.62-1.19]   | 0.371          |
| <b>Receiving a complete PR8<sup>1</sup></b> |          |             |               |                |
| Yes                                         | 440      | <b>1</b>    |               |                |
| No                                          | 1482     | <b>2.38</b> | [1.41-4.02]   | 0.001          |
| <b>Mitotic index</b>                        |          |             |               |                |
| <1_per_mm <sup>2</sup>                      | 533      | <b>1</b>    |               |                |
| ≥1_per_mm <sup>2</sup>                      | 841      | <b>3.10</b> | [1.03-9.38]   | 0.045          |
| Not mentioned in PR                         | 548      | <b>2.01</b> | [0.64-6.29]   | 0.229          |
| <b>Thickness</b>                            |          |             |               |                |
| ≤ 1mm                                       | 969      | <b>0.12</b> | [0.05-0.27]   | 0.000          |
| 1.01mm-2mm                                  | 301      | <b>0.20</b> | [0.11-0.40]   | 0.000          |
| 2.01mm-4mm                                  | 250      | <b>0.63</b> | [0.43-0.92]   | 0.017          |
| > 4mm                                       | 347      | <b>1</b>    |               |                |
| Unknown                                     | 55       | <b>0.45</b> | [0.13-1.51]   | 0.195          |
| <b>Ulceration</b>                           |          |             |               |                |
| Absent                                      | 477      | <b>1</b>    |               |                |
| Present                                     | 1337     | <b>2.11</b> | [1.43-3.13]   | 0.000          |
| Not mentioned in PR                         | 108      | <b>1.72</b> | [0.57-5.12]   | 0.333          |
| <b>Nodal stage</b>                          |          |             |               |                |
| N0                                          | 1324     | <b>0.74</b> | [0.48-1.13]   | 0.162          |
| N1                                          | 37       | <b>2.43</b> | [1.37-4.34]   | 0.003          |
| N2                                          | 17       | <b>1.19</b> | [0.53-2.66]   | 0.667          |
| N3                                          | 16       | <b>1.57</b> | [0.68-3.64]   | 0.288          |
| N+                                          | 3        | <b>2.98</b> | [0.63-14.03]  | 0.168          |
| Nx                                          | 525      | <b>1</b>    |               |                |
| <b>M stage</b>                              |          |             |               |                |
| M0                                          | 1598     | <b>0.69</b> | [0.37-1.30]   | 0.252          |
| M1                                          | 44       | <b>5.35</b> | [2.57-11.12]  | 0.000          |
| Mx                                          | 280      | <b>1</b>    |               |                |

| Charlson comorbidity index (CCI) |      |             |             |       |
|----------------------------------|------|-------------|-------------|-------|
| CCI 0                            | 1275 | <b>1</b>    |             |       |
| CCI >=1                          | 566  | <b>1.51</b> | [1.09-2.09] | 0.014 |
| Unknown                          | 81   | <b>0.84</b> | [0.28-2.51] | 0.745 |

Notes:

<sup>1</sup> Eight recommended histopathological items: Breslow thickness, ulceration, histological subtype, mitotic rate, growth phase, lymphocyte infiltration, tumor regression, and vascular or neural involvement.

<sup>2</sup> Reference for country is the European mean.
